# Supplementary material for: West Nile Virus and Usutu Virus Monitoring of Wild Birds in Germany
Source: PubMed Central journal article supplement (PMC5800270; doi:10.3390/ijerph15010171), 2018-01-22
Supplement: ijerph-15-00171-s001.pdf [file ijerph-15-00171-s001.pdf]

**Table S1.** WNV and USUV neutralization assay results from all wild bird blood samples between 2014 and 2016. Positive samples are highlighted in bold, neutralization titres in brackets.

| Order         | Common Name         | Scientific Name                          | Migration Pattern | No. Samples Tested | WNV pos. (ND <sub>50</sub> )                        | USUV pos. (ND <sub>50</sub> )                                                 |
|---------------|---------------------|------------------------------------------|-------------------|--------------------|-----------------------------------------------------|-------------------------------------------------------------------------------|
| Passeriformes | Carrion Crow        | <i>Corvus corone</i>                     | R, P              | 1                  | 0                                                   | 0                                                                             |
|               | Eurasian Blackbird  | <i>Turdus merula</i>                     | R, P              | 120                | <b>3 (10)</b> , 1 (20), 1 (40) 1 (120),<br>1 *, 2 # | <b>4 (10), 3 (15), 1 (20),<br/>1 (30), 1 (640), 1 (1920),<br/>1 (15), 1 *</b> |
|               | Tomtit              | <i>Cyanistes caeruleus</i>               | R                 | 4                  | 0, 1*                                               | 0                                                                             |
|               | Common Chaffinch    | <i>Fringilla coelebs</i>                 | R, P              | 3                  | 0                                                   | 0                                                                             |
|               | European Goldfinch  | <i>Carduelis carduelis</i>               | R, P              | 1                  | 0                                                   | 0                                                                             |
|               | Western Jackdaw     | <i>Coloeus monedula</i>                  | S                 | 7                  | 0                                                   | 0                                                                             |
|               | Eurasian Bullfinch  | <i>Pyrrhula pyrrhula</i>                 | R, P              | 2                  | 0                                                   | 0                                                                             |
|               | Thrush              | <i>Turdus sp.</i>                        | S, L              | 17                 | 0                                                   | 0                                                                             |
|               | Eurasian Jay        | <i>Garrulus glandarius</i>               | R, P              | 12                 | 0                                                   | 0                                                                             |
|               | Eurasian Magpie     | <i>Pica pica</i>                         | R                 | 19                 | <b>1 (10)</b>                                       | <b>2 (10)</b>                                                                 |
|               | Eurasian Siskin     | <i>Carduelis spinus</i>                  | S                 | 1                  | 0                                                   | 0                                                                             |
|               | Willow Warbler      | <i>Phylloscopus trochilus</i>            | L                 | 1                  | 0                                                   | 0                                                                             |
|               | Finch               | <i>Fringilla sp.</i>                     | R, P, S           | 1                  | 0                                                   | 0                                                                             |
|               | Garden Warbler      | <i>Sylvia borin</i>                      | L                 | 1                  | 0                                                   | 0                                                                             |
|               | Common Redstart     | <i>Phoenicurus phoenicurus</i>           | L                 | 1                  | 0                                                   | 0                                                                             |
|               | Yellowhammer        | <i>Emberiza citrinella</i>               | R, P, S           | 5                  | 0                                                   | 0                                                                             |
|               | Spotted Flycatcher  | <i>Muscicapa striata</i>                 | L                 | 1                  | 0                                                   | 0                                                                             |
|               | Typical Warbler     | <i>Sylvia sp.</i>                        | L                 | 1                  | 1 (10)                                              | 1 (10)                                                                        |
|               | Black Redstart      | <i>Phoenicurus ochruros</i>              | P, S              | 3                  | 0                                                   | 0                                                                             |
|               | House Sparrow       | <i>Passer domesticus</i>                 | R                 | 24                 | 0, 2 *                                              | <b>1 (10)</b>                                                                 |
|               | Grosbeak            | <i>Coccothraustes<br/>coccothraustes</i> | S                 | 8                  | 0                                                   | 0                                                                             |
|               | Eurasian Nuthatch   | <i>Sitta europaea</i>                    | R                 | 2                  | 0                                                   | 0                                                                             |
|               | Great Tit           | <i>Parus major</i>                       | R, (P)            | 11                 | 0                                                   | <b>1 (10)</b>                                                                 |
|               | Common Raven        | <i>Corvus corax</i>                      | R, P              | 6                  | 0                                                   | 0                                                                             |
|               | Crow                | <i>Corvus sp.</i>                        | R, P              | 9                  | 0                                                   | 0                                                                             |
|               | Common House Martin | <i>Delichon urbicum</i>                  | L                 | 11                 | 0                                                   | 0                                                                             |
|               | Eurasian Blackcap   | <i>Sylvia atricapilla</i>                | S, L              | 2                  | 0                                                   | 0                                                                             |
|               | Hooded Crow         | <i>Corvus cornix</i>                     | R, P              | 40                 | <b>1 (10), 1 (20)</b>                               | <b>1 (15)</b>                                                                 |
|               | Carrion Crow        | <i>Corvus corone</i>                     | P, S              | 72                 | <b>1 (30), 1 *</b>                                  | <b>2 (10), 1 (15)</b>                                                         |
|               | Barn Swallow        | <i>Hirundo rustica</i>                   | L                 | 5                  | 0                                                   | 0                                                                             |

|                 |                                      |                                 |          |     |                                                            |                                       |
|-----------------|--------------------------------------|---------------------------------|----------|-----|------------------------------------------------------------|---------------------------------------|
|                 | European Robin                       | <i>Erithacus rubecula</i>       | P        | 6   | 1 *                                                        | 0                                     |
|                 | Rook                                 | <i>Corvus frugilegus</i>        | R, P, S  | 8   | 1 #, 2 *                                                   | 1 #                                   |
|                 | Song Thrush                          | <i>Turdus philomelos</i>        | R, S     | 9   | 1 *                                                        | 0                                     |
|                 | Eurasian Tree Sparrow                | <i>Passer montanus</i>          | R        | 2   | 0                                                          | 0                                     |
|                 | Common Starling                      | <i>Sturnus vulgaris</i>         | R, P, S  | 8   | 0                                                          | 0                                     |
|                 | Coal Tit                             | <i>Parus ater</i>               | R, P     | 1   | 0                                                          | 0                                     |
|                 | Fieldfare                            | <i>Turdus pilaris</i>           | S        | 7   | 0                                                          | 0                                     |
|                 | Common Chiffchaff                    | <i>Hylloscopus collybita</i>    | S, L     | 1   | 0                                                          | 0                                     |
| Accipitriformes | Long-legged Buzzard                  | <i>Buteo rufinus</i>            | zoo bird | 4   | 0                                                          | <b>2 (10)</b>                         |
|                 | Black-chested Buzzard-eagle          | <i>Geranoaetus melanoleucus</i> | zoo bird | 2   | 0                                                          | 0                                     |
|                 | Bearded Vulture                      | <i>Gypaetus barbatus</i>        | zoo bird | 2   | 1 (15)                                                     | <b>1 (30), 1 (40)</b>                 |
|                 | Osprey                               | <i>Pandion haliaetus</i>        | L        | 4   | <b>1 (320)</b>                                             | 1 (10)                                |
|                 | Griffon Vulture                      | <i>Gyps fulvus</i>              | zoo bird | 11  | <b>1 (30)</b>                                              | 1(10)                                 |
|                 | Northern Goshawk                     | <i>Accipiter gentilis</i>       | R, P     | 47  | <b>4 (10), 2 (15)</b>                                      | <b>1 (40)</b>                         |
|                 | Harpy Eagle                          | <i>Harpia harpyja</i>           | zoo bird | 1   | 0                                                          | 0                                     |
|                 | Harris hawk X Red-tailed Hawk Hybrid |                                 | zoo bird | 1   | 0                                                          | 0                                     |
|                 | Imperial Eagle                       | <i>Aquila heliaca</i>           | zoo bird | 4   | 0                                                          | 0                                     |
|                 | Hen Harrier                          | <i>Circus cyaneus</i>           | R, S     | 1   | 0                                                          | 0                                     |
|                 | Ferruginous hawk                     | <i>Buteo regalis</i>            | zoo bird | 4   | 0                                                          | 0                                     |
|                 | King Vulture                         | <i>Sarcorampus papa</i>         | zoo bird | 2   | 0                                                          | 0                                     |
|                 | Common Buzzard                       | <i>Buteo buteo</i>              | R, P, S  | 191 | <b>4 (10), 3 (15), 1 (20), 1 (40),</b><br>2 (15), 3 *, 1 # | <b>1 (10), 1 (20), 1 (30), 3 (10)</b> |
|                 | Cinereous Vulture                    | <i>Aegypius monachus</i>        | zoo bird | 2   | 0                                                          | <b>1 (10)</b>                         |
|                 | Steller's sea Eagle                  | <i>Haliaeetus pelagicus</i>     | zoo bird | 1   | 0                                                          | 0                                     |
|                 | Western Marsh Harrier                | <i>Circus aeruginosus</i>       | L        | 6   | <b>1 (240)</b>                                             | 1 (15)                                |
|                 | Red Kite                             | <i>Milvus milvus</i>            | (R), S   | 22  | <b>1 (10), 2 (15), 1 #</b>                                 | 0                                     |
|                 | Red-tailed Hawk                      | <i>Buteo jamaicensis</i>        | zoo bird | 2   | 0                                                          | 0                                     |
|                 | African Fish Eagle                   | <i>Haliaeetus vocifer</i>       | zoo bird | 4   | 0                                                          | 0                                     |
|                 | Black Kite                           | <i>Milvus migrans</i>           | L        | 7   | 0                                                          | 0                                     |
|                 | White-tailed Eagle                   | <i>Haliaeetus albicilla</i>     | R, P     | 41  | 1 (240)                                                    | 1 (120)                               |
|                 | Eurasian Sparrowhawk                 | <i>Accipiter nisus</i>          | R, P, S  | 31  | <b>1 (10), 1 (15)</b>                                      | 0                                     |
|                 | Rüppell's Vulture                    | <i>Gyps rueppelli</i>           | zoo bird | 3   | 0                                                          | <b>1 (10)</b>                         |
|                 | Golden Eagle                         | <i>Aquila chrysaetos</i>        | zoo bird | 7   | 0                                                          | <b>1 (10)</b>                         |
|                 | Steppe Eagle                         | <i>Aquila nipalensis</i>        | zoo bird | 4   | 0                                                          | 0                                     |
|                 | Bald Eagle                           | <i>Haliaeetus leucocephalus</i> | zoo bird | 12  | 0                                                          | 0                                     |

|               |                                      |                                   |            |     |                                            |                                    |
|---------------|--------------------------------------|-----------------------------------|------------|-----|--------------------------------------------|------------------------------------|
|               | Europ. Honey Buzzard                 | <i>Pernis apivorus</i>            | L          | 7   | <b>1 (15)</b>                              | 0                                  |
|               | White-headed Vulture                 | <i>Trigonoceps occipitalis</i>    | zoo bird   | 3   | 0                                          | <b>1 (30)</b>                      |
|               | Harris -Hawk                         | <i>Parabuteo unicinctus</i>       | zoo bird   | 13  | 0                                          | 0                                  |
| Falconiformes | Eurasian Hobby                       | <i>Falco subbuteo</i>             | L          | 7   | <b>1 (80)</b>                              | 0                                  |
|               | Striated Caracara                    | <i>Phalcoboenus australis</i>     | zoo bird   | 2   | 0                                          | 0                                  |
|               | Gyr Falcon                           | <i>Falco rusticolus</i>           | zoo bird   | 5   | 0                                          | 0                                  |
|               | Gyr Falcon X Saker Falcon Hybrid     |                                   | zoo bird   | 1   | 0                                          | 0                                  |
|               | Gyr Falcon X Peregrine Falcon Hybrid |                                   | zoo bird   | 1   | 0                                          | 0                                  |
|               | Lanner Falcon                        | <i>Falco biarmicus</i>            | zoo bird   | 3   | 0                                          | 0                                  |
|               | Merlin                               | <i>Falco columbarius</i>          | zoo bird   | 1   | 0                                          | 0                                  |
|               | Red-footed Falcon                    | <i>Falco vespertinus</i>          | L          | 1   | <b>1 (80)</b>                              | 1 (10)                             |
|               | Barbary Falcon                       | <i>Falco pelegrinoides</i>        | zoo bird   | 1   | 0                                          | <b>1 (20)</b>                      |
|               | Saker Falcon                         | <i>Falco cherrug</i>              | zoo bird   | 7   | 0                                          | 0                                  |
|               | Southern Crested Caracara            | <i>Caracara plancus</i>           | zoo bird   | 4   | 0                                          | 0                                  |
|               | European Kestrel                     | <i>Falco tinnunculus</i>          | R, P, S    | 133 | <b>2 (10), 2 (15), 1 (20), 2 (30)</b>      | <b>1 (10), 1 #</b>                 |
|               | Peregrine Falcon                     | <i>Falco peregrinus</i>           | R, P       | 24  | 0                                          | 0                                  |
| Strigiformes  | Great Horned Owl                     | <i>Bubo virginianus</i>           | zoo bird   | 2   | 0                                          | 0                                  |
|               | Great Grey Owl                       | <i>Strix nebulosa</i>             | zoo bird   | 12  | 1 (30)                                     | <b>1 (480)</b>                     |
|               | Owl                                  | <i>Strigidae (Fam.)</i>           | R, P, S, L | 1   | 0                                          | 0                                  |
|               | Spotted Eagle-owl                    | <i>Bubo africanus</i>             | zoo bird   | 9   | 0                                          | 0                                  |
|               | Ural Owl                             | <i>Strix uralensis</i>            | zoo bird   | 7   | 0                                          | 0                                  |
|               | Boreal Owl                           | <i>Aegolius funereus</i>          | R, P       | 1   | 1 *                                        | 0                                  |
|               | Common Barn Owl                      | <i>Tyto alba</i>                  | R, P       | 40  | 0, 1 *                                     | 0                                  |
|               | Snowy Owl                            | <i>Bubo scandiacus</i>            | zoo bird   | 15  | 0                                          | 0                                  |
|               | Northern Hawk Owl                    | <i>Surnia ulula</i>               | zoo bird   | 2   | 0                                          | 0                                  |
|               | Eurasian Pygmy Owl                   | <i>Glaucidium passerinum</i>      | R          | 1   | 0                                          | 0                                  |
|               | Little Owl                           | <i>Athene noctua</i>              | R          | 15  | 0                                          | 0                                  |
|               | Short-eared Owl                      | <i>Asio flammeus</i>              | L          | 2   | 0                                          | <b>1 (20)</b>                      |
|               | Eurasian Eagle Owl                   | <i>Bubo bubo</i>                  | R          | 24  | 0                                          | <b>1 (20)</b>                      |
|               | Eurasian Tawny Owl                   | <i>Strix aluco</i>                | R          | 37  | <b>1 (10), 1 *</b>                         | <b>1 (10), 1 (40), 1 (80)</b>      |
|               | Northern Long-eared Owl              | <i>Asio otus</i>                  | R, P, S    | 39  | 1 #, 1 *                                   | <b>1 (10), 1 (20), 1 (40)</b>      |
| Columbiformes | Common Wood Pigeon                   | <i>Columba palumbus</i>           | R, P, S    | 141 | <b>1 (10), 2 (15), 2 (20), 1 (15), 2 *</b> | <b>1 (10), 1 (30)</b>              |
|               | City Pigeon                          | <i>Columba livia f. domestica</i> | R, (P)     | 119 | <b>4 (10), 1 (15), 1 *</b>                 | <b>1 (10), 1 (20), 1 (15), 1 #</b> |
|               | Eurasian Collared Dove               | <i>Streptopelia decaocto</i>      | R, (P)     | 2   | 0                                          | 0                                  |
| Anseriformes  | Common Shelduck                      | <i>Tadorna tadorna</i>            | S          | 1   | 0                                          | 0                                  |

|                  |                             |                                |            |    |                               |                               |
|------------------|-----------------------------|--------------------------------|------------|----|-------------------------------|-------------------------------|
|                  | Greater white-fronted Goose | <i>Anser albifrons</i>         | S          | 1  | 0                             | 0                             |
|                  | Duck                        | <i>Anas platyrhynchos</i>      | R, P, S    | 27 | 0                             | 0                             |
|                  | Graylag Goose               | <i>Anser anser</i>             | R, P, S    | 4  | 0                             | 0                             |
|                  | Northern Mallard Duck       | <i>Anas platyrhynchos</i>      | R, P, S    | 1  | 0                             | 0                             |
|                  | Mute Swan                   | <i>Cygnus olor</i>             | R, P, S    | 58 | 0                             | 0                             |
|                  | Canada Goose                | <i>Branta canadensis</i>       | zoo bird   | 1  | 0                             | 0                             |
|                  | Pink-footed Goose           | <i>Anser brachyrhynchus</i>    | zoo bird   | 1  | 0                             | 0                             |
|                  | Egyptian Goose              | <i>Alopochen aegyptiacus</i>   | zoo bird   | 6  | <b>1 (10)</b>                 | 0                             |
|                  | Swan                        | <i>Cygnus sp.</i>              | R, P, S    | 4  | 0                             | 0                             |
|                  | Swan Goose                  | <i>Anser cygnoides</i>         | zoo bird   | 1  | 0                             | 0                             |
|                  | Whooper Swan                | <i>Cygnus cygnus</i>           | S          | 2  | 0                             | 0                             |
|                  | Common Scoter               | <i>Melanitta nigra</i>         | S          | 2  | 0                             | 0                             |
| Gruiformes       | Eurasian Coot               | <i>Fulica atra</i>             | P, S       | 4  | <b>1 (10), 1 (15), 1 (30)</b> | 0                             |
|                  | Common Moorhen              | <i>Gallinula chloropus</i>     | R, P, S    | 2  | 0                             | 0                             |
| Apodiiformes     | Common Swift                | <i>Apus apus</i>               | L          | 23 | <b>1 (10), 1 (20)</b>         | <b>1 (10), 1 (40), 1 (60)</b> |
| Caprimulgiformes | European Nightjar           | <i>Caprimulgus europaeus</i>   | L          | 1  | 0                             | 0                             |
| Ciconiiformes    | Northern Gannet             | <i>Morus bassanus</i>          | zoo bird   | 1  | 0                             | 0                             |
| Pelicaniformes   | Grey Heron                  | <i>Ardea cinerea</i>           | R, P, S    | 27 | 1 *                           | <b>1 (15)</b>                 |
|                  | Heron                       | <i>Ardeidae (Fam.)</i>         | R, P, S, L | 2  | 0                             | 0                             |
|                  | Black Stork                 | <i>Ciconia nigra</i>           | L          | 2  | 0                             | 0                             |
|                  | Great Egret                 | <i>Ardea alba</i>              | zoo bird   | 1  | 0                             | 0                             |
|                  | White Stork                 | <i>Ciconia ciconia</i>         | L          | 13 | <b>1 (240)</b>                | <b>1 (10), 1 (20)</b>         |
| Charadriiformes  | Sandwich Tern               | <i>Thalasseus sandvicensis</i> | S, L       | 1  | 0                             | 0                             |
|                  | Lesser Black-backed Gull    | <i>Larus fuscus</i>            | P, S, L    | 1  | 0                             | 0                             |
|                  | Black-headed Gull           | <i>Larus ridibundus</i>        | R, P, S    | 3  | 1 (10)                        | <b>1 (10), 1 (30)</b>         |
|                  | Gull                        | <i>Laridae (Fam.)</i>          | R, S, L    | 1  | 0                             | <b>1 (10)</b>                 |
|                  | European Herring Gull       | <i>Larus argentatus</i>        | R, S       | 8  | 0, 2 *                        | 0                             |
|                  | Common Gull                 | <i>Larus canus</i>             | R, S       | 4  | 0                             | 0                             |
|                  | Eurasian Woodcock           | <i>Scolopax rusticola</i>      | R, S       | 25 | 1 (10), 1 *                   | 1 (10)                        |
| Coraciiformes    | Common Kingfisher           | <i>Alcedo atthis</i>           | R, S       | 1  | 0                             | 0                             |
| Cuculiformes     | Common Cuckoo               | <i>Cuculus canorus</i>         | L          | 3  | 1 *                           | 0                             |
| Galliformes      | Common Pheasant             | <i>Phasianus colchicus</i>     | R          | 1  | 0                             | 0                             |
|                  | Rock Partridge              | <i>Alectoris graeca</i>        | R          | 1  | 0                             | 0                             |
|                  | Common Quail                | <i>Coturnix coturnix</i>       | S, L       | 1  | 0                             | 0                             |
| Piciformes       | Great Spotted Woodpecker    | <i>Dendrocopos major</i>       | R, P, (S)  | 25 | <b>1 (20)</b>                 | 0                             |

|                  |                           |                            |          |             |             |           |
|------------------|---------------------------|----------------------------|----------|-------------|-------------|-----------|
|                  | Eurasian Green Woodpecker | <i>Picus viridis</i>       | R, (P)   | 25          | 1 (20), 1 * | 1 (10)    |
|                  | Black Woodpecker          | <i>Dryocopus martius</i>   | R, P     | 2           | 0           | 0         |
| Podicipediformes | Great Crested Grebe       | <i>Podiceps cristatus</i>  | R        | 1           | 0           | 0         |
| Psittaciformes   | Rose-ringed Parakeet      | <i>Psittacula krameri</i>  | zoo bird | 1           | 0           | 0         |
| Suliformes       | Great Cormorant           | <i>Phalacrocorax carbo</i> | R, S     | 5           | 1 *         | 1 (10)    |
| <b>Total</b>     |                           |                            |          | <b>1825</b> | <b>58</b>   | <b>56</b> |

\* Not done because insufficient serum volume for both tests # Not analyzable because sample is cytotoxic or coverings on the cells. R = resident species, P = partial migrant, S = short distance migrant, L = long distance migrant.
